# Supplementary material for: ATF3 Promotes Arsenic-Induced Apoptosis and Oppositely Regulates DR5 and Bcl-xL Expression in Human Bronchial Epithelial Cells
Source: MDPI journal article supplement (doi:10.3390/ijms22084223), 2021-04-19

## Supplementary Figure 1

### The inhibition of U0126 and LY294002 on ERK and AKT pathway, respectively.

(A) BEAS-2B cells were pretreated with 10  $\mu$ M U0126 for 1 h and then exposed to 20  $\mu$ M arsenic for 4 h. The expression of p-ERK and ERK was measured by western blot to confirm the inhibitory effect of U0126.

(B) BEAS-2B cells were pretreated with 10  $\mu$ M LY294002 for 1 h and then exposed to 20  $\mu$ M arsenic for 4 h. The expression of p-AKT and AKT was measured by western blot to confirm the inhibitory effect of LY294002.

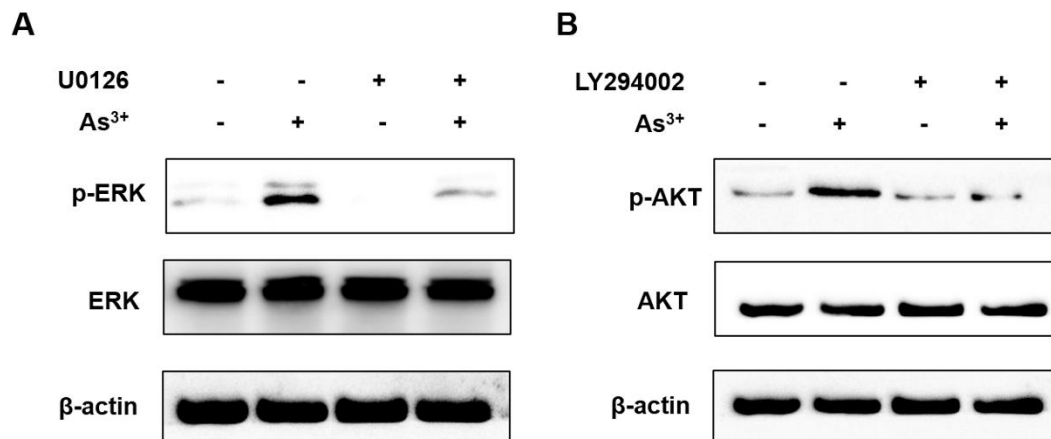

# Supplementary Figure 2

## Overexpression ATF3 in ATF3 KO BEAS-2B cells restored arsenic-induced apoptosis.

ATF3 KO BEAS-2B cells were transfected with empty vector or ATF3-expressing plasmid (pATF3), followed by exposure to 20  $\mu$ M arsenic for 24 h.

- (A) The overexpression of ATF3 was confirmed by western blot.
- (B) The expression of procaspase 3 and cleaved caspase 3 was detected by western blot.
- (C) Cells were stained with Annexin V/PI, and examined by flow cytometry.
- (D) Percentage of apoptotic cells was the sum of percentages of early- and late-phase apoptotic cells from the results obtained by flow cytometry. Data are presented as mean  $\pm$  SD of three independent experiments. Statistics was performed by paired t-test. \*  $p < 0.05$ , compared with parent cells.

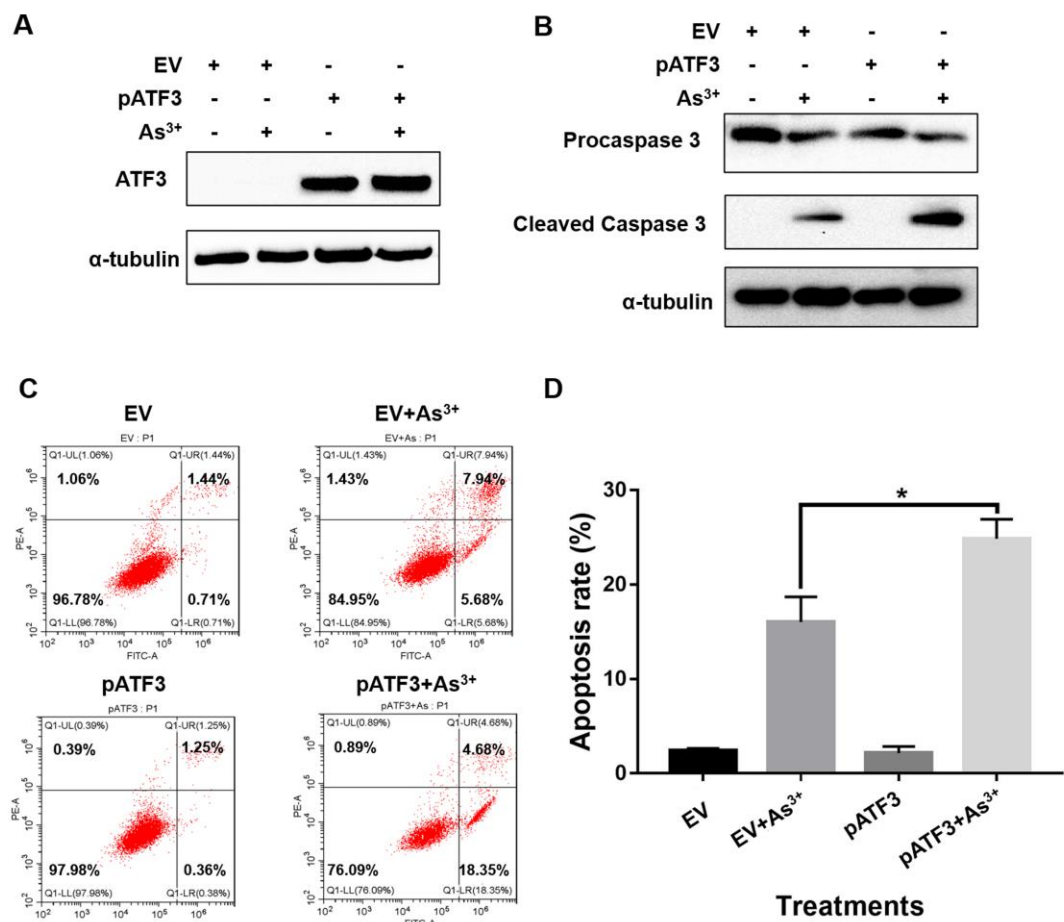

## Supplementary Figure 3

### ChIP assay with ATF3 KO BEAS-2B cells.

ATF3 KO BEAS-2B cells were treated with or without 20  $\mu$ m arsenic for 12 h. ChIP assay was conducted.

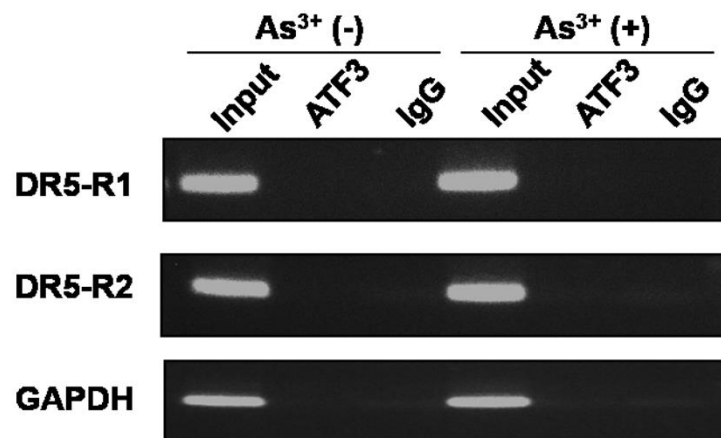

## Supplementary Figure 4

Using ATF3 KO BEAS-2B cells for ChIP assay as negative control.

ATF3 KO BEAS-2B cells were treated with or without 20  $\mu$ m arsenic for 12 h. ChIP assay was conducted.

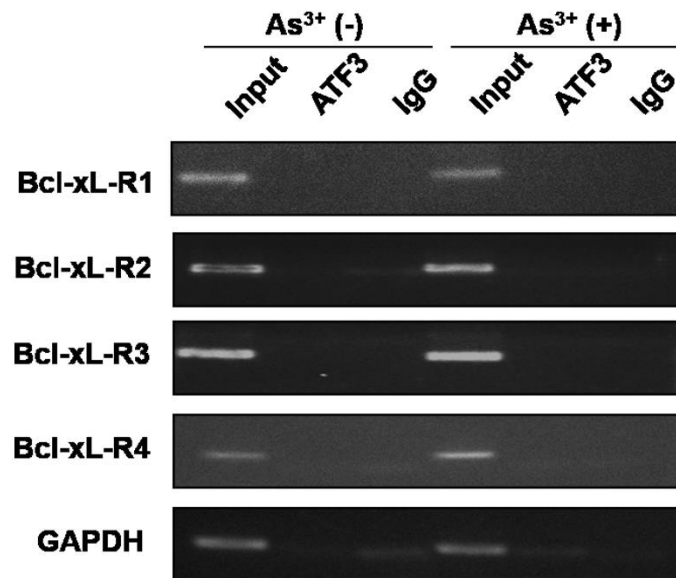

Supplement: s1 [file s1]
